# Supplementary material for: A Systematic Review and Meta-Analysis of the Effects of Food Safety and Hygiene Training on Food Handlers
Source: PubMed Central journal article supplement (PMC7555000; doi:10.3390/foods9091169), 2020-08-25
Supplement: foods-09-01169-s001.pdf [file foods-09-01169-s001.pdf]

Table S1. PRISMA Checklist

| Section/topic                      | #  | Checklist item                                                                                                                                                                                                                                                                                              | Reported on section   |
|------------------------------------|----|-------------------------------------------------------------------------------------------------------------------------------------------------------------------------------------------------------------------------------------------------------------------------------------------------------------|-----------------------|
| <b>TITLE</b>                       |    |                                                                                                                                                                                                                                                                                                             |                       |
| Title                              | 1  | Identify the report as a systematic review, meta-analysis, or both.                                                                                                                                                                                                                                         | Title                 |
| <b>ABSTRACT</b>                    |    |                                                                                                                                                                                                                                                                                                             |                       |
| Structured summary                 | 2  | Provide a structured summary including, as applicable: background; objectives; data sources; study eligibility criteria, participants, and interventions; study appraisal and synthesis methods; results; limitations; conclusions and implications of key findings; systematic review registration number. | Abstract              |
| <b>INTRODUCTION</b>                |    |                                                                                                                                                                                                                                                                                                             |                       |
| Rationale                          | 3  | Describe the rationale for the review in the context of what is already known.                                                                                                                                                                                                                              | Introduction          |
| Objectives                         | 4  | Provide an explicit statement of questions being addressed with reference to participants, interventions, comparisons, outcomes, and study design (PICOS).                                                                                                                                                  | Introduction          |
| <b>METHODS</b>                     |    |                                                                                                                                                                                                                                                                                                             |                       |
| Protocol and registration          | 5  | Indicate if a review protocol exists, if and where it can be accessed (e.g., Web address), and, if available, provide registration information including registration number.                                                                                                                               | Materials and Methods |
| Eligibility criteria               | 6  | Specify study characteristics (e.g., PICOS, length of follow-up) and report characteristics (e.g., years considered, language, publication status) used as criteria for eligibility, giving rationale.                                                                                                      | Materials and Methods |
| Information sources                | 7  | Describe all information sources (e.g., databases with dates of coverage, contact with study authors to identify additional studies) in the search and date last searched.                                                                                                                                  | Materials and Methods |
| Search                             | 8  | Present full electronic search strategy for at least one database, including any limits used, such that it could be repeated.                                                                                                                                                                               | Data S1               |
| Study selection                    | 9  | State the process for selecting studies (i.e., screening, eligibility, included in systematic review, and, if applicable, included in the meta-analysis).                                                                                                                                                   | Materials and Methods |
| Data collection process            | 10 | Describe method of data extraction from reports (e.g., piloted forms, independently, in duplicate) and any processes for obtaining and confirming data from investigators.                                                                                                                                  | Materials and Methods |
| Data items                         | 11 | List and define all variables for which data were sought (e.g., PICOS, funding sources) and any assumptions and simplifications made.                                                                                                                                                                       | Materials and Methods |
| Risk of bias in individual studies | 12 | Describe methods used for assessing risk of bias of individual studies (including specification of whether this was done at the study or outcome level), and how this information is to be used in any data synthesis.                                                                                      | Materials and Methods |
| Summary measures                   | 13 | State the principal summary measures (e.g., risk ratio, difference in means).                                                                                                                                                                                                                               | Materials and Methods |
| Synthesis of results               | 14 | Describe the methods of handling data and combining results of studies, if done, including measures of consistency (e.g., I <sup>2</sup> ) for each meta-analysis.                                                                                                                                          | Materials and Methods |

| Section/topic                 | #  | Checklist item                                                                                                                                                                                           | Reported on page #      |
|-------------------------------|----|----------------------------------------------------------------------------------------------------------------------------------------------------------------------------------------------------------|-------------------------|
| Risk of bias across studies   | 15 | Specify any assessment of risk of bias that may affect the cumulative evidence (e.g., publication bias, selective reporting within studies).                                                             | Methods                 |
| Additional analyses           | 16 | Describe methods of additional analyses (e.g., sensitivity or subgroup analyses, meta-regression), if done, indicating which were pre-specified.                                                         | N/A                     |
| <b>RESULTS</b>                |    |                                                                                                                                                                                                          |                         |
| Study selection               | 17 | Give numbers of studies screened, assessed for eligibility, and included in the review, with reasons for exclusions at each stage, ideally with a flow diagram.                                          | Results and Figure 1    |
| Study characteristics         | 18 | For each study, present characteristics for which data were extracted (e.g., study size, PICOS, follow-up period) and provide the citations.                                                             | Table 1                 |
| Risk of bias within studies   | 19 | Present data on risk of bias of each study and, if available, any outcome level assessment (see item 12).                                                                                                | Table S4                |
| Results of individual studies | 20 | For all outcomes considered (benefits or harms), present, for each study: (a) simple summary data for each intervention group (b) effect estimates and confidence intervals, ideally with a forest plot. | Table 1 and Figures 2-6 |
| Synthesis of results          | 21 | Present results of each meta-analysis done, including confidence intervals and measures of consistency.                                                                                                  | Results and Figures 2-6 |
| Risk of bias across studies   | 22 | Present results of any assessment of risk of bias across studies (see Item 15).                                                                                                                          | Results and Figures 7-9 |
| Additional analysis           | 23 | Give results of additional analyses, if done (e.g., sensitivity or subgroup analyses, meta-regression [see Item 16]).                                                                                    | N/A                     |
| <b>DISCUSSION</b>             |    |                                                                                                                                                                                                          |                         |
| Summary of evidence           | 24 | Summarize the main findings including the strength of evidence for each main outcome; consider their relevance to key groups (e.g., healthcare providers, users, and policy makers).                     | Results                 |
| Limitations                   | 25 | Discuss limitations at study and outcome level (e.g., risk of bias), and at review-level (e.g., incomplete retrieval of identified research, reporting bias).                                            | Discussion              |
| Conclusions                   | 26 | Provide a general interpretation of the results in the context of other evidence, and implications for future research.                                                                                  | Conclusions             |
| <b>FUNDING</b>                |    |                                                                                                                                                                                                          |                         |
| Funding                       | 27 | Describe sources of funding for the systematic review and other support (e.g., supply of data); role of funders for the systematic review.                                                               | N/A                     |

## Data S1. Search Strategy

### 1. Pubmed

#### *Population*

(Food?handl\*[tiab] OR "food workers"[tiab] OR "food employees"[tiab]) AND ("food industry/process industry"[Mesh] OR food?manufactur\* OR agri?food OR "farm" OR "restaurant" OR "retail" OR "food service" OR "food street" OR "food business" OR "hospital" OR "school" OR universit\*)

#### *Intervention*

("Intervention" OR "training"[tiab] OR "evaluation"[tiab]) AND (("food safety"[tiab]) OR ("good manufacturing practices"[tiab]) OR ("hazard analysis"[tiab]) OR (hand?washing[tiab]) OR (person?!?hygiene[tiab]) OR (clean\*) OR (sanitization) OR (cross?contamination) OR (temperature?control) OR (food?handl\*))

#### *Outcome*

("Knowledge"[tiab] OR "attitude"[tiab] OR "practice"[tiab] OR "behavior"[tiab]) AND ("food safety" OR "good manufacturing practices" OR "good hygiene practices" OR "hazard analysis" OR "foodborne diseases" OR hand?washing OR "personal hygiene" OR clean\* OR "sanitization" OR cross?contamination OR "temperature control")

### 2. The Cochrane Controlled Register of Trials (CENTRAL)

#### *Population*

((Food handl\*). ti,ab. OR (food workers). ti,ab. OR (food employees). ti,ab.) AND ((food industry OR food process industry)OR food?manufactur\* OR agri?food OR farm OR restaurant OR retail OR food service OR food street OR food business OR hospital OR school OR universit\*)

#### *Intervention*

((Intervention). ti,ab. OR (training). ti,ab. OR (evaluation). ti,ab.) AND ((food safety). ti,ab. OR (good manufacturing practices). ti,ab. OR (hazard analysis). ti,ab. OR (hand?wash\*). ti,ab. OR (person?! hygiene). ti,ab. OR (clean\*) OR (sanitization) OR (cross?contamination) OR (temperature?control) OR (food handl\*))

#### *Outcome*

((Knowledge). ti,ab. OR (attitude). ti,ab. OR (practice). ti,ab. OR (behavior). ti,ab) AND ("food safety" OR "good manufacturing practices" OR "good hygiene practices" OR "hazard analysis" OR "foodborne diseases" OR hand?washing OR "personal hygiene" OR clean\* OR "sanitization" OR cross?contamination OR "temperature control"))

### 3. Ebsco

#### *Population*

(Food?handl\*[tiab] OR "food workers"[tiab] OR "food employees"[tiab]) AND ("food industry/process industry"[Mesh] OR food?manufactur\* OR agri?food OR "farm" OR "restaurant" OR "retail" OR "food service" OR "food street" OR "food business" OR "hospital" OR "school" OR universit\*)

#### *Intervention*

("Intervention" OR "training"[tiab] OR "evaluation"[tiab]) AND (("food safety"[tiab]) OR ("good manufacturing practices"[tiab]) OR ("hazard analysis"[tiab]) OR (hand?washing[tiab]) OR (person?!?hygiene[tiab]) OR (clean\*) OR (sanitization) OR (cross?contamination) OR (temperature?control) OR (food?handl\*))

*Outcome*

("Knowledge"[tiab] OR "attitude"[tiab] OR "practice"[tiab] OR "behavior"[tiab]) AND ("food safety" OR "good manufacturing practices" OR "good hygiene practices" OR "hazard analysis" OR "foodborne diseases" OR hand?washing OR "personal hygiene" OR clean\* OR "sanitization" OR cross?contamination OR "temperature control")

#### **4. Scopus**

*Population*

((("Food handlers") AND ("food industry" OR "food process industry" OR "agri-food" OR "farm" OR "restaurant" OR "food street" OR "hospital" OR "school" OR "university"))

*Intervention*

((("Intervention" OR "training" OR "evaluation") AND ("food safety" OR "hand washing" OR "personal hygiene" OR "clean and sanitization" OR "cross-contamination" OR "temperature control" OR "food handling"))

*Outcome*

((("Knowledge" OR "attitude" OR "practice" OR "behavior") AND ("food safety" OR "foodborne diseases" OR hand washing OR "personal hygiene" OR "clean and sanitization" OR "cross-contamination" OR "temperature control"))

#### **5. Web of Science**

*Population*

((("Food handlers") AND ("food industry" OR "food process industry" OR "agri-food" OR "farm" OR "restaurant" OR "food street" OR "hospital" OR "school" OR "university"))

*Intervention*

((("Intervention" OR "training" OR "evaluation") AND ("food safety" OR "hand washing" OR "personal hygiene" OR "clean and sanitization" OR "cross-contamination" OR "temperature control" OR "food handling"))

*Outcome*

((("Knowledge" OR "attitude" OR "practice" OR "behavior") AND ("food safety" OR "foodborne diseases" OR hand washing OR "personal hygiene" OR "clean and sanitization" OR "cross-contamination" OR "temperature control"))

Table S2. Geographical distribution of studies selected

| Country     | Total |
|-------------|-------|
| USA         | 9     |
| Malaysia    | 4     |
| Canada      | 2     |
| Brazil      | 2     |
| UK          | 2     |
| Turkey      | 1     |
| Korea       | 1     |
| India       | 1     |
| Nigeria     | 1     |
| Lebanon     | 1     |
| Bangladesh  | 1     |
| UA Emirates | 1     |
| China       | 1     |
| Scotland    | 1     |
| Iran        | 1     |
| Kenya       | 1     |
| Italy       | 1     |

Table S3. Distribution per year of studies selected

| Year | Total |
|------|-------|
| 1997 | 1     |
| 2002 | 1     |
| 2004 | 2     |
| 2005 | 1     |
| 2006 | 2     |
| 2007 | 1     |
| 2008 | 1     |
| 2009 | 2     |
| 2010 | 1     |
| 2011 | 2     |
| 2012 | 2     |
| 2013 | 3     |
| 2014 | 2     |
| 2015 | 2     |
| 2016 | 3     |
| 2018 | 3     |
| 2019 | 2     |

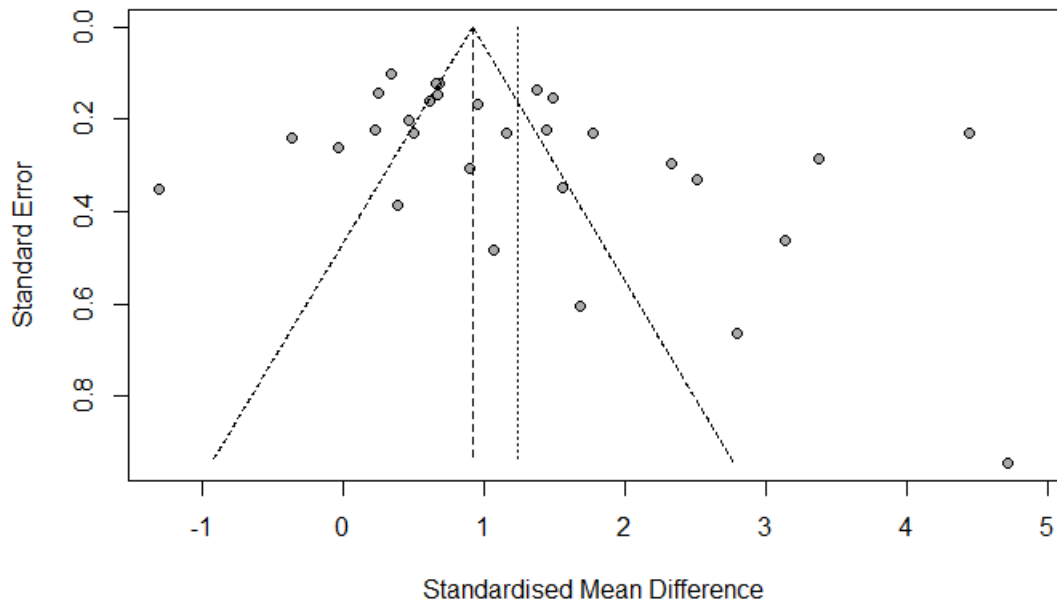

**Figure S1.** Funnel plot – Risk of publication bias of knowledge

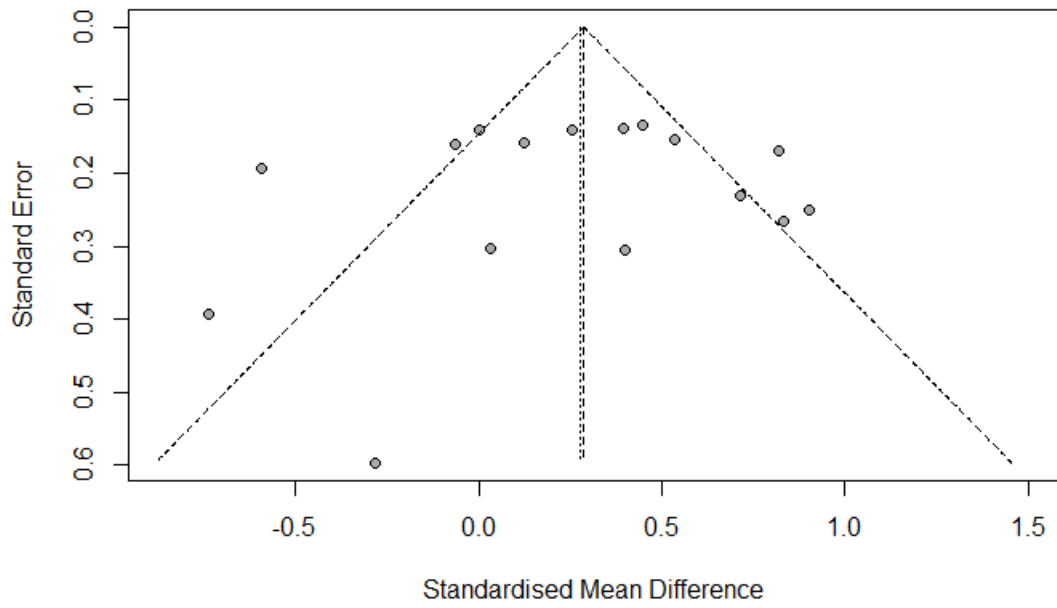

**Figure S2.** Funnel plot – Risk of publication bias of attitude

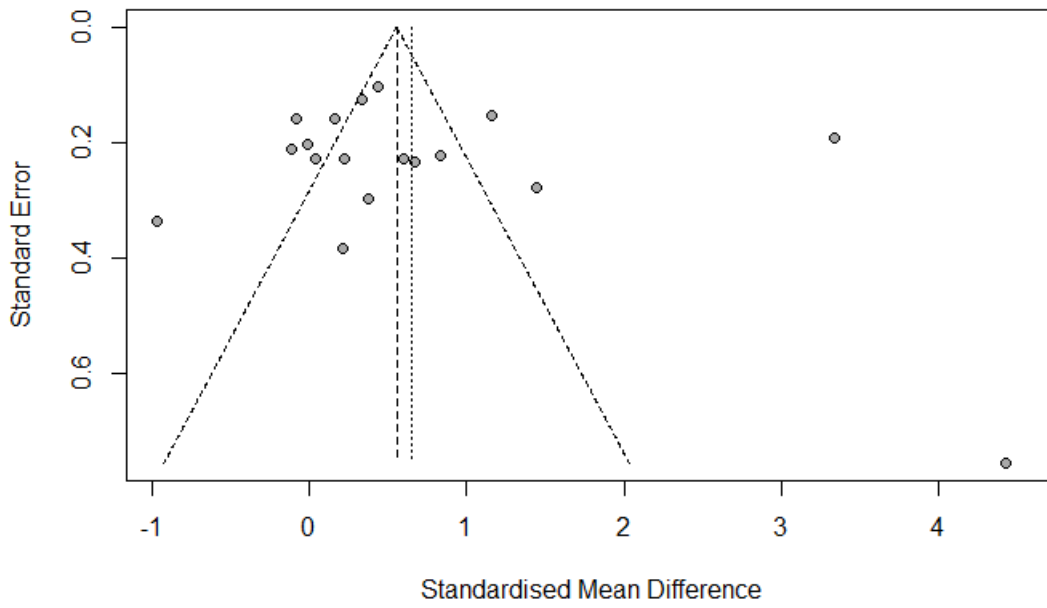

**Figure S3.** Funnel plot – Risk of publication bias of overall practices

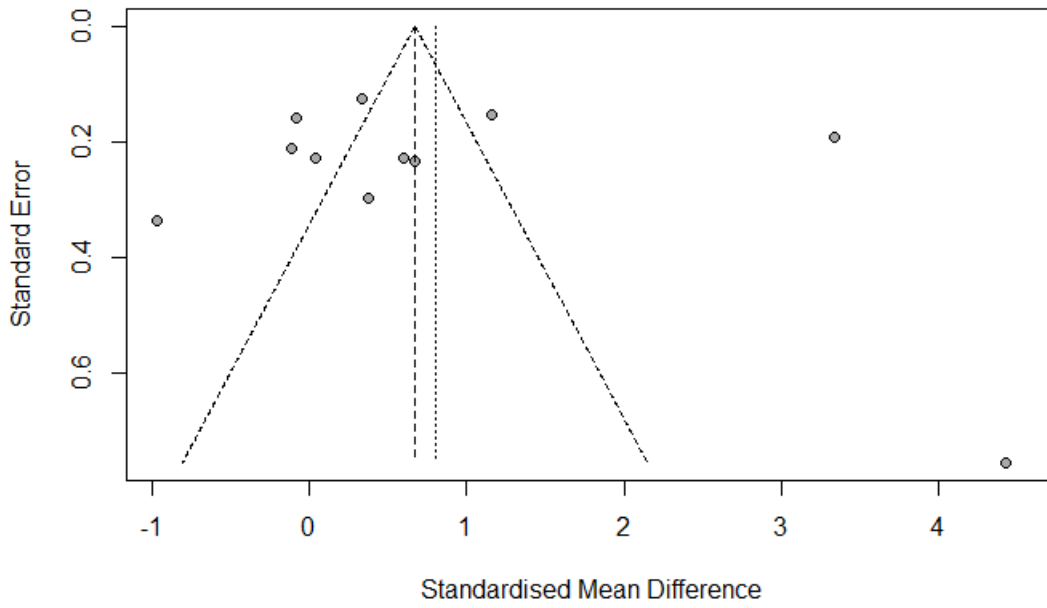

**Figure S4.** Funnel plot – Risk of publication bias of self-reported practice

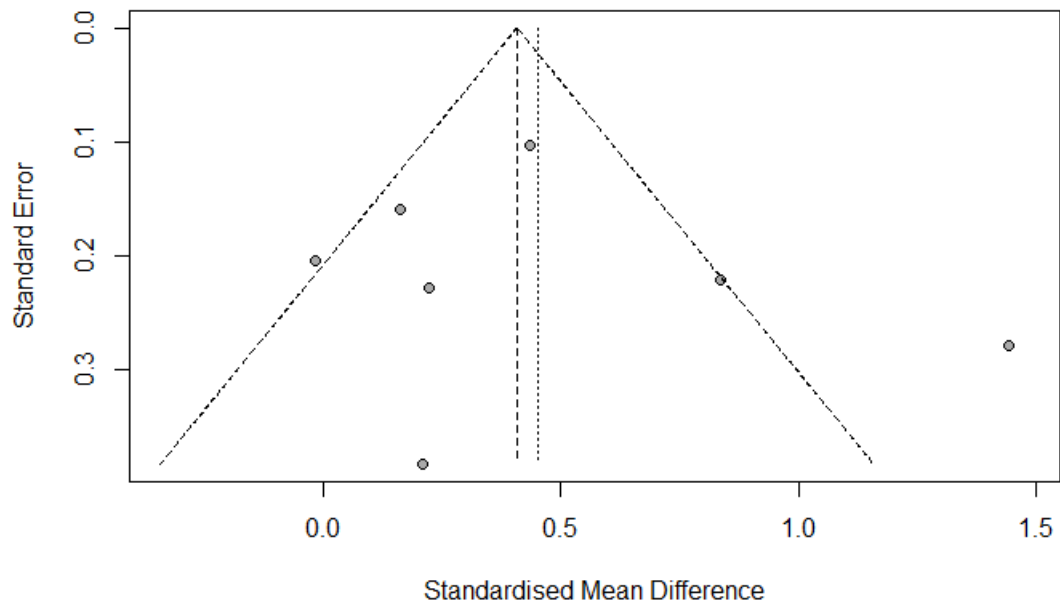

**Figure S5.** Funnel plot –Risk of publication bias of observed practice



**Table S4.** Risk of bias for randomized studies

| Study                        | Risk of bias domains |    |    |    |    | Overall |
|------------------------------|----------------------|----|----|----|----|---------|
|                              | D1                   | D2 | D3 | D4 | D5 |         |
| Ehiri et al., 1997           |                      |    |    |    |    |         |
| Crags-Dino, 2002             |                      |    |    |    |    |         |
| Abernathy & Hart, 2004       |                      |    |    |    |    |         |
| Lillquist et al, 2005        |                      |    |    |    |    |         |
| Fenton et al, 2006           |                      |    |    |    |    |         |
| Nieto-Montenegro et al, 2007 |                      |    |    |    |    |         |
| York et al, 2009             |                      |    |    |    |    |         |
| Farzianpour et al., 2012     |                      |    |    |    |    |         |
| Richard, 2013                |                      |    |    |    |    |         |
| Nyamari, 2013                |                      |    |    |    |    |         |
| Nik Husain et al, 2016       |                      |    |    |    |    |         |
| Nik Husain et al, 2018       |                      |    |    |    |    |         |

Domains:  
D1: Bias arising from the randomization process  
D2: Bias due to deviations from intended intervention.  
D3: Bias due to missing outcome data.  
D4: Bias in measurement of the outcome.  
D5: Bias in selection of the reported result.

Judgement  
 High  
 Some concerns  
 Low

**Table S5.** Risk of bias for nonrandomized studies

| Study                       | Risk of bias domains |    |    |    |    |    |    | Overall |
|-----------------------------|----------------------|----|----|----|----|----|----|---------|
|                             | D1                   | D2 | D3 | D4 | D5 | D6 | D7 |         |
| Mathiasen, 2004             | -                    | X  | -  | X  | +  | -  | -  | X       |
| Walker et al., 2006         | -                    | X  | -  | -  | +  | +  | -  | -       |
| Acikel et al, 2008          | -                    | X  | -  | -  | +  | -  | -  | -       |
| Park et al, 2009            | -                    | +  | +  | +  | +  | -  | -  | -       |
| Brannon et al., 2009        | -                    | X  | -  | X  | +  | +  | -  | X       |
| Choudhury et al, 2011       | -                    | X  | -  | +  | +  | -  | -  | -       |
| Fielding et al, 2011        | -                    | +  | +  | +  | +  | -  | -  | -       |
| Soon and Blaines, 2012      | -                    | X  | -  | +  | +  | +  | -  | -       |
| Strohbehn et al., 2013      | -                    | X  | -  | +  | +  | +  | -  | -       |
| Afolaranmi et al, 2014      | -                    | X  | -  | +  | +  | -  | -  | -       |
| Da-Cunha et al, 2014        | -                    | X  | -  | X  | +  | X  | -  | X       |
| Faour-Klingbeil et al, 2015 | -                    | X  | -  | X  | +  | X  | -  | X       |
| Abushelaibi et al, 2015     | -                    | X  | -  | +  | +  | -  | -  | -       |
| Riaz et al, 2016            | -                    | X  | -  | +  | +  | -  | -  | -       |
| Norhaslinda et al, 2016     | -                    | X  | -  | X  | +  | -  | -  | X       |
| Has et al, 2018             | -                    | X  | -  | +  | +  | -  | -  | X       |
| Graspassonnet et al, 2018   | -                    | X  | -  | X  | +  | -  | -  | X       |
| Auad et al., 2019           | -                    | X  | -  | X  | +  | -  | -  | X       |
| Ma et al, 2019              | -                    | X  | -  | X  | +  | -  | -  | X       |

Domains:  
D1: Bias due to confounding.  
D2: Bias due to selection of participants.  
D3: Bias in classification of interventions.  
D4: Bias due to deviations from intended interventions.  
D5: Bias due to missing data.  
D6: Bias in measurement of outcomes.  
D7: Bias in selection of the reported result.

Judgement  
 Serious  
 Moderate  
 Low
